# Supplementary material
Source: PubMed Central journal article supplement (PMC5535075)
Supplement: NIHMS880826-supplement-supplement_1.pdf [file NIHMS880826-supplement-supplement_1.pdf]

## Explicit Consideration of Baseline Factors to Assess Recombinant Tissue-Type Plasminogen Activator Response With Respect to Race and Sex

Pitchaiah Mandava, Santosh B. Murthy, Melody Munoz, Dawn McGuire, Roger P. Simon, Andrei V. Alexandrov, Karen C. Albright, Amelia K. Boehme, Sheryl Martin-Schild, Sharyl Martini and Thomas A. Kent

*Stroke*. 2013;44:1525-1531; originally published online May 14, 2013;

doi: 10.1161/STROKEAHA.113.001116

*Stroke* is published by the American Heart Association, 7272 Greenville Avenue, Dallas, TX 75231

Copyright © 2013 American Heart Association, Inc. All rights reserved.

Print ISSN: 0039-2499. Online ISSN: 1524-4628

The online version of this article, along with updated information and services, is located on the World Wide Web at:

<http://stroke.ahajournals.org/content/44/6/1525>

Data Supplement (unedited) at:

<http://stroke.ahajournals.org/content/suppl/2013/05/17/STROKEAHA.113.001116.DC1>

**Permissions:** Requests for permissions to reproduce figures, tables, or portions of articles originally published in *Stroke* can be obtained via RightsLink, a service of the Copyright Clearance Center, not the Editorial Office. Once the online version of the published article for which permission is being requested is located, click Request Permissions in the middle column of the Web page under Services. Further information about this process is available in the [Permissions and Rights Question and Answer](#) document.

**Reprints:** Information about reprints can be found online at:  
<http://www.lww.com/reprints>

**Subscriptions:** Information about subscribing to *Stroke* is online at:  
<http://stroke.ahajournals.org/subscriptions/>

# Explicit Consideration of Baseline Factors to Assess Recombinant Tissue-Type Plasminogen Activator Response with Respect to Race and Sex

## Supplemental Material

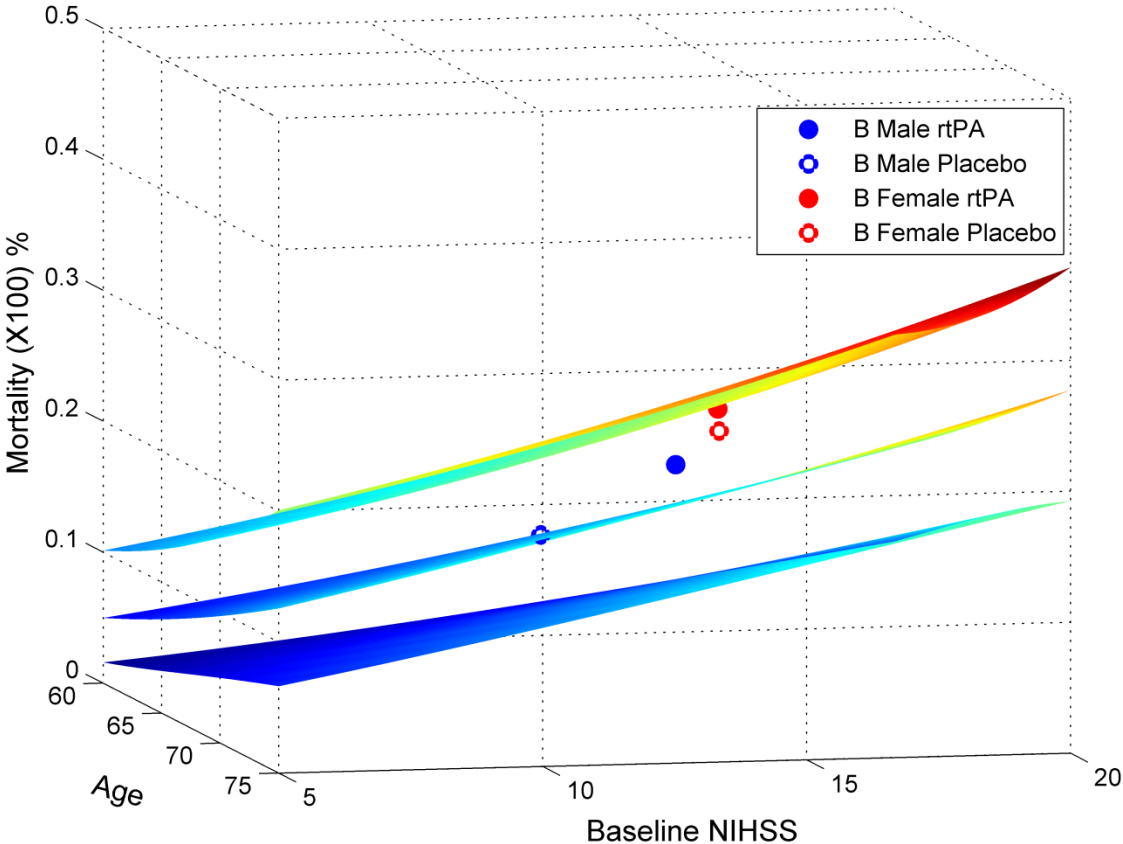

### Supplement Figure I. Mortality at 90 days for NINDS black subgroups relative to the pPREDICTS© natural history model of acute ischemic stroke

The pPREDICTS© mortality model shows percent mortality at 90 days according to baseline NIHSS and age. The NINDS black (B) subgroup results are superimposed on the model at the corresponding baseline NIHSS and age. Black groups tended to have a higher mortality than predicted by natural history, even in the rtPA treated groups. The subgroup of black females treated with rtPA approached the  $p=0.05$  upper boundary for significantly higher mortality.

**Supplement Table IA: Post-match results by gender. All treated with rtPA**

|              | Males     | Females   | p     |
|--------------|-----------|-----------|-------|
| Median NIHSS | 15.0      | 14.0      | 0.997 |
| Mean NIHSS   | 14.1±7.13 | 14.0±7.07 | 0.985 |
| Age          | 68.9±10.6 | 69.4±11.2 | 0.692 |
| Glucose      | 140±51.26 | 140±49.00 | 0.990 |
| SV/LV/CE n   | 20/36/60  | 20/36/60  |       |
| SV/LV/CE %   | 17/31/52  | 17/31/52  |       |
| mRS 0-1      | 0.431     | 0.440     | 1.000 |
| mRS 0-2      | 0.517     | 0.500     | 0.883 |
| BI 95-100    | 0.543     | 0.509     | 0.265 |
| GOS 0-1      | 0.474     | 0.466     | 1.000 |
| NIHSS 0-1    | 0.379     | 0.319     | 0.371 |
| Mortality    | 0.172     | 0.138     | 0.540 |
| Symp Hem     | 0.060     | 0.052     | 1.000 |
| Asym Hem     | 0.043     | 0.052     | 1.000 |

No race matching. Ninety-day outcomes of post matched pairs compared by McNemar's test.

**Supplement Table IB. Post match results by gender showing treatment effect of rtPA**

|              | Males rtPA | Males Plac | p     | Females rtPA | Females Plac | p     |
|--------------|------------|------------|-------|--------------|--------------|-------|
| Median NIHSS | 15.0       | 13.5       | 0.758 | 16.0         | 16.0         | 0.608 |
| Mean NIHSS   | 14.1±6.65  | 13.9±6.49  | 0.776 | 16.0±6.86    | 16.5±6.57    | 0.580 |
| Age          | 67.5±11.2  | 66.2±10.2  | 0.258 | 69.3±11.3    | 67.0±13.4    | 0.160 |
| Glucose      | 145±71.01  | 148±71.65  | 0.775 | 149±65.01    | 146±65.30    | 0.776 |
| SV/LV/CE n   | 20/72/64   | 20/72/64   |       | 9/38/62      | 9/38/62      |       |
| SV/LV/CE %   | 13/46/41   | 13/46/41   |       | 8/35/57      | 8/35/57      |       |
| mRS 0-1      | 0.423      | 0.282      | 0.004 | 0.358        | 0.294        | 0.296 |
| mRS 0-2      | 0.513      | 0.404      | 0.037 | 0.431        | 0.367        | 0.337 |
| BI 95-100    | 0.519      | 0.410      | 0.200 | 0.431        | 0.330        | 0.078 |
| GOS 0-1      | 0.462      | 0.333      | 0.016 | 0.385        | 0.303        | 0.176 |
| NIHSS 0-1    | 0.365      | 0.205      | 0.001 | 0.266        | 0.220        | 0.499 |
| Mortality    | 0.173      | 0.218      | 0.349 | 0.183        | 0.202        | 0.850 |
| Symp Hem     | 0.051      | 0.000      | 0.013 | 0.083        | 0.009        | 0.027 |
| Asym Hem     | 0.038      | 0.013      | 0.289 | 0.055        | 0.037        | 0.724 |

Post match results. Left Half: Male rtPA vs placebo. Right Half: Female rtPA vs placebo. No race matching. Ninety-day outcomes of post matched pairs compared by McNemar's test.

**Supplement Table IIA. Post match results by race**

|              | White rtPA | Black rtPA | p     |
|--------------|------------|------------|-------|
| Median NIHSS | 15.0       | 15.0       | 0.899 |
| Mean NIHSS   | 14.8±6.81  | 15.0±7.22  | 0.830 |
| Age          | 67.5±10.1  | 66.4±10.6  | 0.528 |
| Glucose      | 134±54.95  | 136±59.39  | 0.775 |
| SV/LV/CE n   | 12/26/33   | 12/26/33   |       |
| SV/LV/CE %   | 17/37/46   | 17/37/46   |       |
| mRS 0-1      | 0.465      | 0.366      | 0.190 |
| mRS 0-2      | 0.549      | 0.408      | 0.078 |
| BI 95-100    | 0.563      | 0.437      | 0.169 |
| GOS 0-1      | 0.479      | 0.394      | 0.286 |
| NIHSS 0-1    | 0.324      | 0.282      | 0.663 |
| Mortality    | 0.183      | 0.197      | 1.000 |
| Symp Hem     | 0.042      | 0.028      | 1.000 |
| Asym Hem     | 0.014      | 0.028      | 1.000 |

Post Match results: White Subjects treated with rtPA vs Black subjects treated with rtPA. No gender matching. Ninety-day outcomes of post matched pairs compared by McNemar's test.

**Supplement Table IIB. Post-match results by race**

|              | W rtPA    | W Plac    | p     | B rtPA    | B Plac    | p     |
|--------------|-----------|-----------|-------|-----------|-----------|-------|
| Median NIHSS | 14.0      | 15.0      | 0.643 | 15.0      | 14.0      | 0.670 |
| Mean NIHSS   | 14.4±6.81 | 14.8±6.82 | 0.649 | 14.8±7.28 | 15.3±6.46 | 0.676 |
| Age          | 70.5±10.3 | 69.0±10.4 | 0.190 | 65.2±11.6 | 63.7±12.7 | 0.461 |
| Glucose      | 140±54.07 | 142±54.88 | 0.761 | 142±65.77 | 142±65.68 | 0.953 |
| SV/LV/CE n   | 15/70/78  | 15/70/78  |       | 13/27/34  | 13/27/34  |       |
| SV/LV/CE %   | 9/43/48   | 9/43/48   |       | 18/36/46  | 18/36/46  |       |
| mRS 0-1      | 0.448     | 0.276     | 0.000 | 0.365     | 0.270     | 0.248 |
| mRS 0-2      | 0.552     | 0.374     | 0.000 | 0.419     | 0.378     | 0.700 |
| BI 95-100    | 0.552     | 0.368     | 0.002 | 0.446     | 0.365     | 0.628 |
| GOS 0-1      | 0.485     | 0.319     | 0.001 | 0.405     | 0.311     | 0.281 |
| NIHSS 0-1    | 0.368     | 0.184     | 0.000 | 0.270     | 0.216     | 0.556 |
| Mortality    | 0.153     | 0.215     | 0.165 | 0.189     | 0.162     | 0.814 |
| Symp Hem     | 0.055     | 0.000     | 0.008 | 0.027     | 0.014     | 1.000 |
| Asym Hem     | 0.037     | 0.025     | 0.724 | 0.027     | 0.014     | 1.000 |

Post Match results: Left half: White rtPA vs placebo. Right Half: Black rtPA vs placebo. No gender matching. Ninety-day outcomes of post matched pairs compared by McNemar's test.

**Supplement Table III: Comparison of baseline variables between Matched White and Black Females. All treated with rtPA**

| Baseline Variables      | White rtPA  | Black rtPA   | p            |
|-------------------------|-------------|--------------|--------------|
| Weight                  | 79.8±19.62  | 67.9±14.35   | 0.009        |
| Time to treatment       | 117.7±37.94 | 132.5±41.06  | 0.151        |
| Systolic BP             | 155.2±20.17 | 156.4±21.74  | 0.825        |
| Diastolic BP            | 84.5±13.53  | 89.0±9.61    | 0.143        |
| Hematocrit              | 40.2±4.20   | 39.7±4.30    | 0.644        |
| BUN                     | 22.6±12.31  | 17.0±7.93    | 0.041        |
| Creatinine              | 1.2±0.71    | 1.1±0.39     | 0.351        |
| Fibrinogen              | 359.4±83.4  | 350.4±104.71 | 0.723        |
| History of Diabetes     | 0.10        | 0.47         | <i>0.002</i> |
| History of Hypertension | 0.67        | 0.77         | <i>0.549</i> |
| History of Aspirin use  | 0.43        | 0.20         | <i>0.118</i> |
| History of Athero       | 0.40        | 0.53         | <i>0.503</i> |
| History of Smoking      | 0.33        | 0.40         | <i>0.791</i> |
| History of Hyperlipid.  | 0.53        | 0.40         | <i>0.424</i> |
| History of Cardiac Dis  | 0.57        | 0.43         | <i>0.424</i> |
| History of MI           | 0.13        | 0.10         | <i>1.000</i> |
| History of CHF          | 0.07        | 0.23         | <i>0.125</i> |

**Supplement Table IV: Comparison of baseline variables and efficacy and safety outcomes for females pre-match, post-match and eliminated subjects**

|                 | Pre-Match     |               |       | Post-Match    |               |       | Eliminated                  |                           |       |
|-----------------|---------------|---------------|-------|---------------|---------------|-------|-----------------------------|---------------------------|-------|
|                 | White<br>rtPA | Black<br>rtPA | p     | White<br>rtPA | Black<br>rtPA | p     | White<br>rtPA<br>Eliminated | Black<br>rtPA<br>Outliers | p     |
| Median<br>NIHSS | 11.0          | 12.0          | 0.314 | 12.5          | 13.0          | 0.922 | 9.0                         | 6.5                       | 0.772 |
| Mean<br>NIHSS   | 11.9±7.79     | 12.7±7.21     | 0.375 | 12.8±7.04     | 12.9±7.07     | 0.902 | 10.9±8.56                   | 10.0±9.07                 | 0.786 |
| Age             | 70.0±14.7     | 67.1±17.3     | 0.104 | 68.5±15.5     | 67.6±17.2     | 0.690 | 72.0±13.4                   | 60.2±18.7                 | 0.023 |
| Glucose         | 139±59.77     | 154±94.08     | 0.077 | 138±62.45     | 138±62.37     | 0.951 | 140±56.55                   | 371±176.03                | 0.000 |
| Number          | 201           | 120           |       | 112           | 112           |       | 89                          | 8                         |       |
| mRS 0-1         | 0.284         | 0.208         | 0.147 | 0.304         | 0.205         | 0.054 | 0.258                       | 0.250                     | 1.000 |
| mRS 0-2         | 0.358         | 0.333         | 0.717 | 0.357         | 0.339         | 0.864 | 0.360                       | 0.250                     | 0.709 |
| Mort            | 0.114         | 0.075         | 0.336 | 0.071         | 0.071         | 0.803 | 0.169                       | 0.125                     | 1.000 |
| S Hem           | 0.080         | 0.033         | 0.150 | 0.045         | 0.036         | 1.000 | 0.124                       | 0.000                     | 0.591 |



**Supplement Table V: Comparison of baseline variables and efficacy and safety outcomes for males pre-match, post-match and eliminated subjects**

|              | Pre-Match  |            |       | Post-Match |            |       | Eliminated            |                     |       |
|--------------|------------|------------|-------|------------|------------|-------|-----------------------|---------------------|-------|
|              | White rtPA | Black rtPA | p     | White rtPA | Black rtPA | p     | White rtPA Eliminated | Black rtPA Outliers | p     |
| Median NIHSS | 10.0       | 10.0       | 0.795 | 11.0       | 10.5       | 0.967 | 10.0                  | 6.0                 | 0.731 |
| Mean NIHSS   | 11.3±7.06  | 11.6±7.48  | 0.644 | 11.6±7.18  | 11.6±7.21  | 0.993 | 10.9±6.93             | 11.7±11.39          | 0.755 |
| Age          | 64.8±14.6  | 62.3±13.9  | 0.102 | 62.7±13.4  | 62.6±13.9  | 0.946 | 67.3±15.6             | 58.0±13.7           | 0.085 |
| Glucose      | 138±61.83  | 134±64.67  | 0.501 | 125±48.58  | 126±48.15  | 0.841 | 155±71.91             | 249±142.35          | 0.001 |
| Number       | 247        | 145        |       | 136        | 136        |       | 111                   | 9                   |       |
| mRS 0-1      | 0.348      | 0.283      | 0.219 | 0.331      | 0.287      | 0.417 | 0.369                 | 0.222               | 0.487 |
| mRS 0-2      | 0.421      | 0.400      | 0.750 | 0.434      | 0.404      | 0.658 | 0.405                 | 0.333               | 0.740 |
| Mort         | 0.097      | 0.062      | 0.262 | 0.088      | 0.066      | 0.628 | 0.108                 | 0.000               | 0.596 |
| S Hem        | 0.024      | 0.062      | 0.098 | 0.015      | 0.059      | 0.114 | 0.036                 | 0.111               | 0.327 |
